# Supplementary material
Source: publisher site journal article supplement (https://www.e-cmh.org/upload/media/cmh-2023-0506-Supplementary-Table-4.pdf)
Supplement: Supplementary file 1 [file cmh-2023-0506-Supplementary-Table-4.pdf]

**Supplementary Table 4.** qRT-PCR primers

| Gene                      | Forward Primers (5' to 3') | Reverse Primers (5' to 3') |
|---------------------------|----------------------------|----------------------------|
| Murine <i>Jcad</i>        | CCCATACGCACAGTAGGACA       | GGTTGATTAAAAACCGTGCCTC     |
| Murine <i>α-SMA</i>       | CCAGCACCATGAAGATCAAG       | TGGAAGGTAGACAGCGAAGC       |
| Murine <i>Tgf-β</i>       | CCACCTGCAAGACCATCGAC       | CTGGCGAGCCTTAGTTTGGAC      |
| Murine <i>Ctgf</i>        | GGCCTCTTCTGCGATTTCCG       | GCAGCTTGACCCTTCTCCGG       |
| Murine <i>Col-1a1</i>     | GAGCGGAGAGTACTGGATCG       | GCTTCTTTTCTTGGGGTTC        |
| Murine <i>Col-3a1</i>     | ATGACTGTCCCACGTAAGCA       | GCTGCACATCAACGACATCT       |
| Murine <i>Ck19</i>        | AACTGAACCTGATTCTTGG        | AGGCGTGTCTGTCTCAAAC        |
| Murine <i>Timp1</i>       | CACTCACTGTTTGTGGACGGA      | CAAGCAAAGTGACGGCTCTG       |
| Murine <i>C-myb</i>       | ACTCAACTGCCAATGAAGTCG      | TTCTGTTCACCTTGCG           |
| Murine <i>Fibronectin</i> | GAGTGGGAGCGTTGTCTG         | CCGTTGTCATGGCACCATTAGA     |
| Murine <i>Pcna</i>        | GCCACATTGGAGATGCTGTTG      | TCTCTATGGTTACCGCCTCT       |
| Murine <i>Cyclin D1</i>   | CCATGGTAGCTGCTGGGAG        | CCAGGGCCTTGACCGGG          |
| Murine <i>β-actin</i>     | GTCAGAAGGACTCCTATGTG       | ACGCAGCTCATTGTAGAAG        |
| Human <i>JCAD</i>         | AGACCCTGGATTGGAACCTC       | TGACCGCCACACACATTAT        |
| Human <i>α-SMA</i>        | CATCATGCGTCTGGATCTGG       | CACGCTCAGCAGTAGTAACG       |
| Human <i>TGF-β</i>        | CAGCAGGGATAACACTGC         | CATGAGAAGCAGGAAAGGCC       |
| Human <i>CTGF</i>         | TGCAGGCTAGAGAAGCAGAG       | TGGGAGTACGGATGCACTTT       |
| Human <i>COL-1a1</i>      | TTCAGGGAATGCCTGGTGAA       | GAGAGCCATCAGCACCTTTG       |
| Human <i>COL-3a1</i>      | CCTGAAGCTGATGGGTCAA        | TTCCCCAGTGTGTTCTGTGC       |
| Human <i>YAP</i>          | GAACCTCGGCTTCAGGTCCTC      | GGTTCATGGCAAACGAGGG        |
| Human <i>TIMP1</i>        | GGAGAGTGTCTGCGGATACTTC     | GCAGGTAGTGATGTGCAAGAGTC    |
| Human <i>C-MYB</i>        | GACCTGAGAAGGAAAAGCGA       | TGTGGTCTGTGTCTGCTGT        |
| Human <i>FIBRONECTIN</i>  | CCGCCGAATGTAGGACAAGA       | AGGGTTCTTCATCAGTGCCA       |
| Human <i>CYCLIN D1</i>    | GATCAAGTGTGACCCGGACT       | CTTGGGGTCCATGTTCTGCT       |
| Human <i>β-actin</i>      | GGCATGGGTCAGAAGGATTC       | TACTTCAGGGTGAGGATGCC       |
